# Supplementary material
Source: PubMed Central journal article supplement (PMC7253024)
Supplement: jciinsight-5-132055-s008.pdf [file jciinsight-5-132055-s008.pdf]

# **Supplementary Figures**

Ahmadi et al

## Supplementary Figure S1

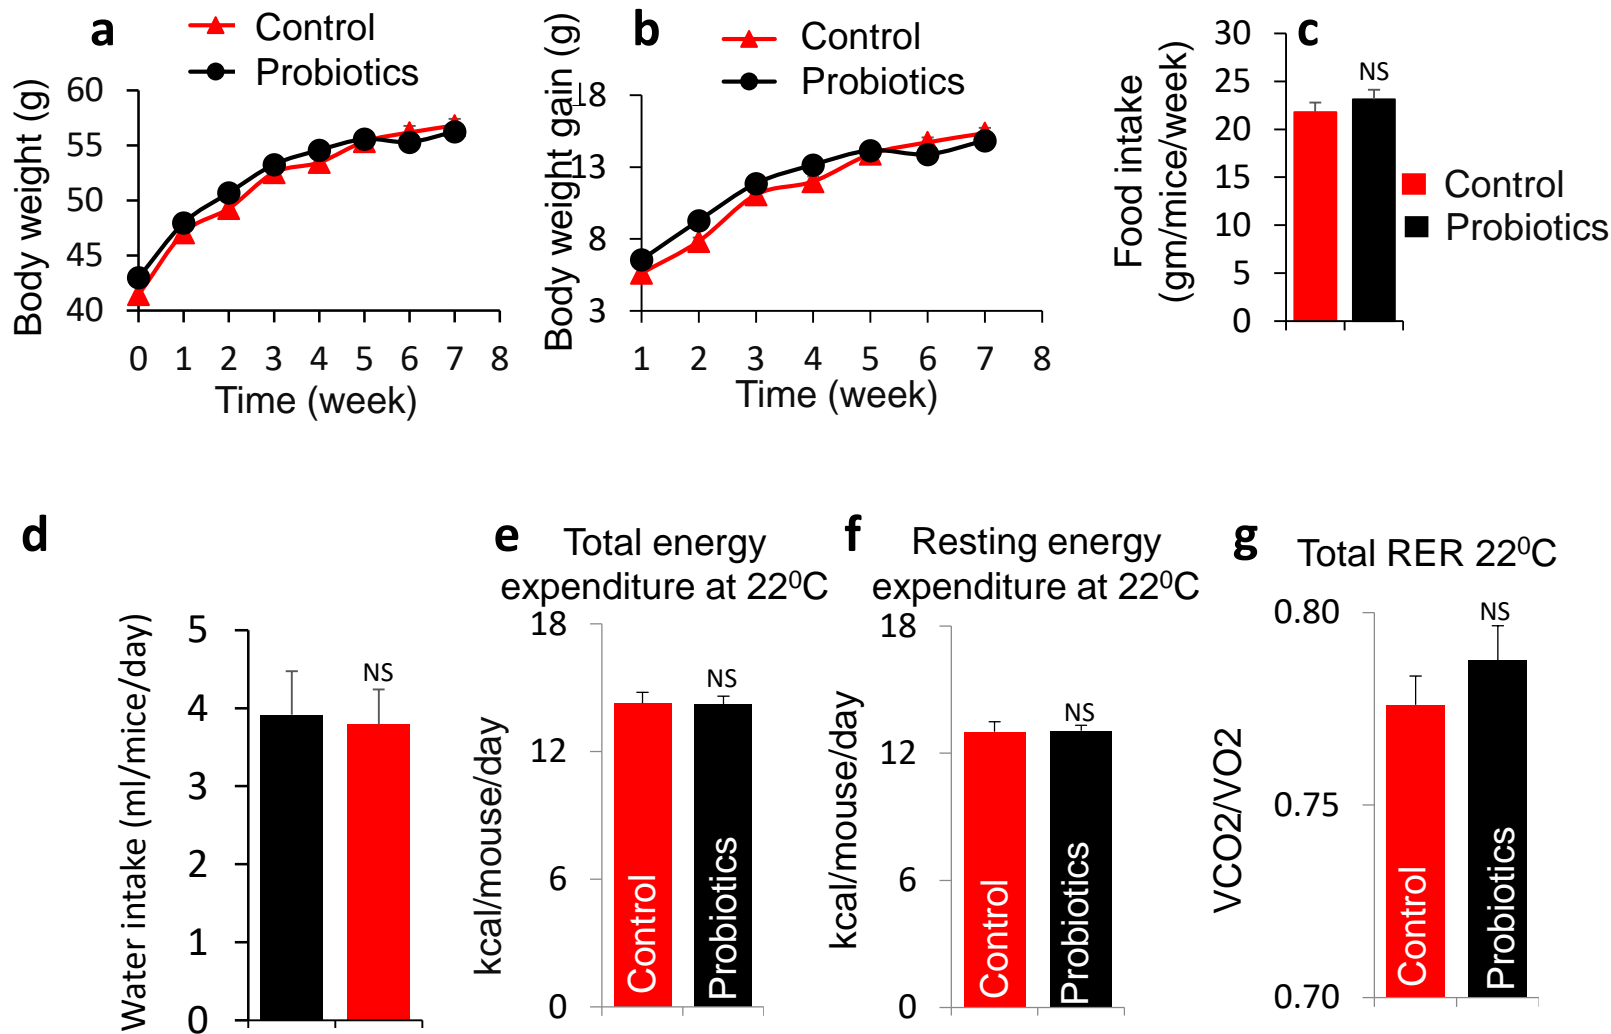

**Supplementary Figure S1.** Probiotic cocktail (black) feeding show no significant impact on body weight (a), body weight gain (b), food intake (c), water intake (d), total (e) and resting (f) energy expenditure and respiratory exchange ratio (REF) (g) compared to their controls (red). Values are presented graph bar as means of n= 5-8 mice per group and error bars are SEM. ns: not significant; kcal: kilo calories; VO<sub>2</sub>: volume of oxygen consumption and VCO<sub>2</sub>: volume of carbon dioxide release.

# Supplementary Figure S2

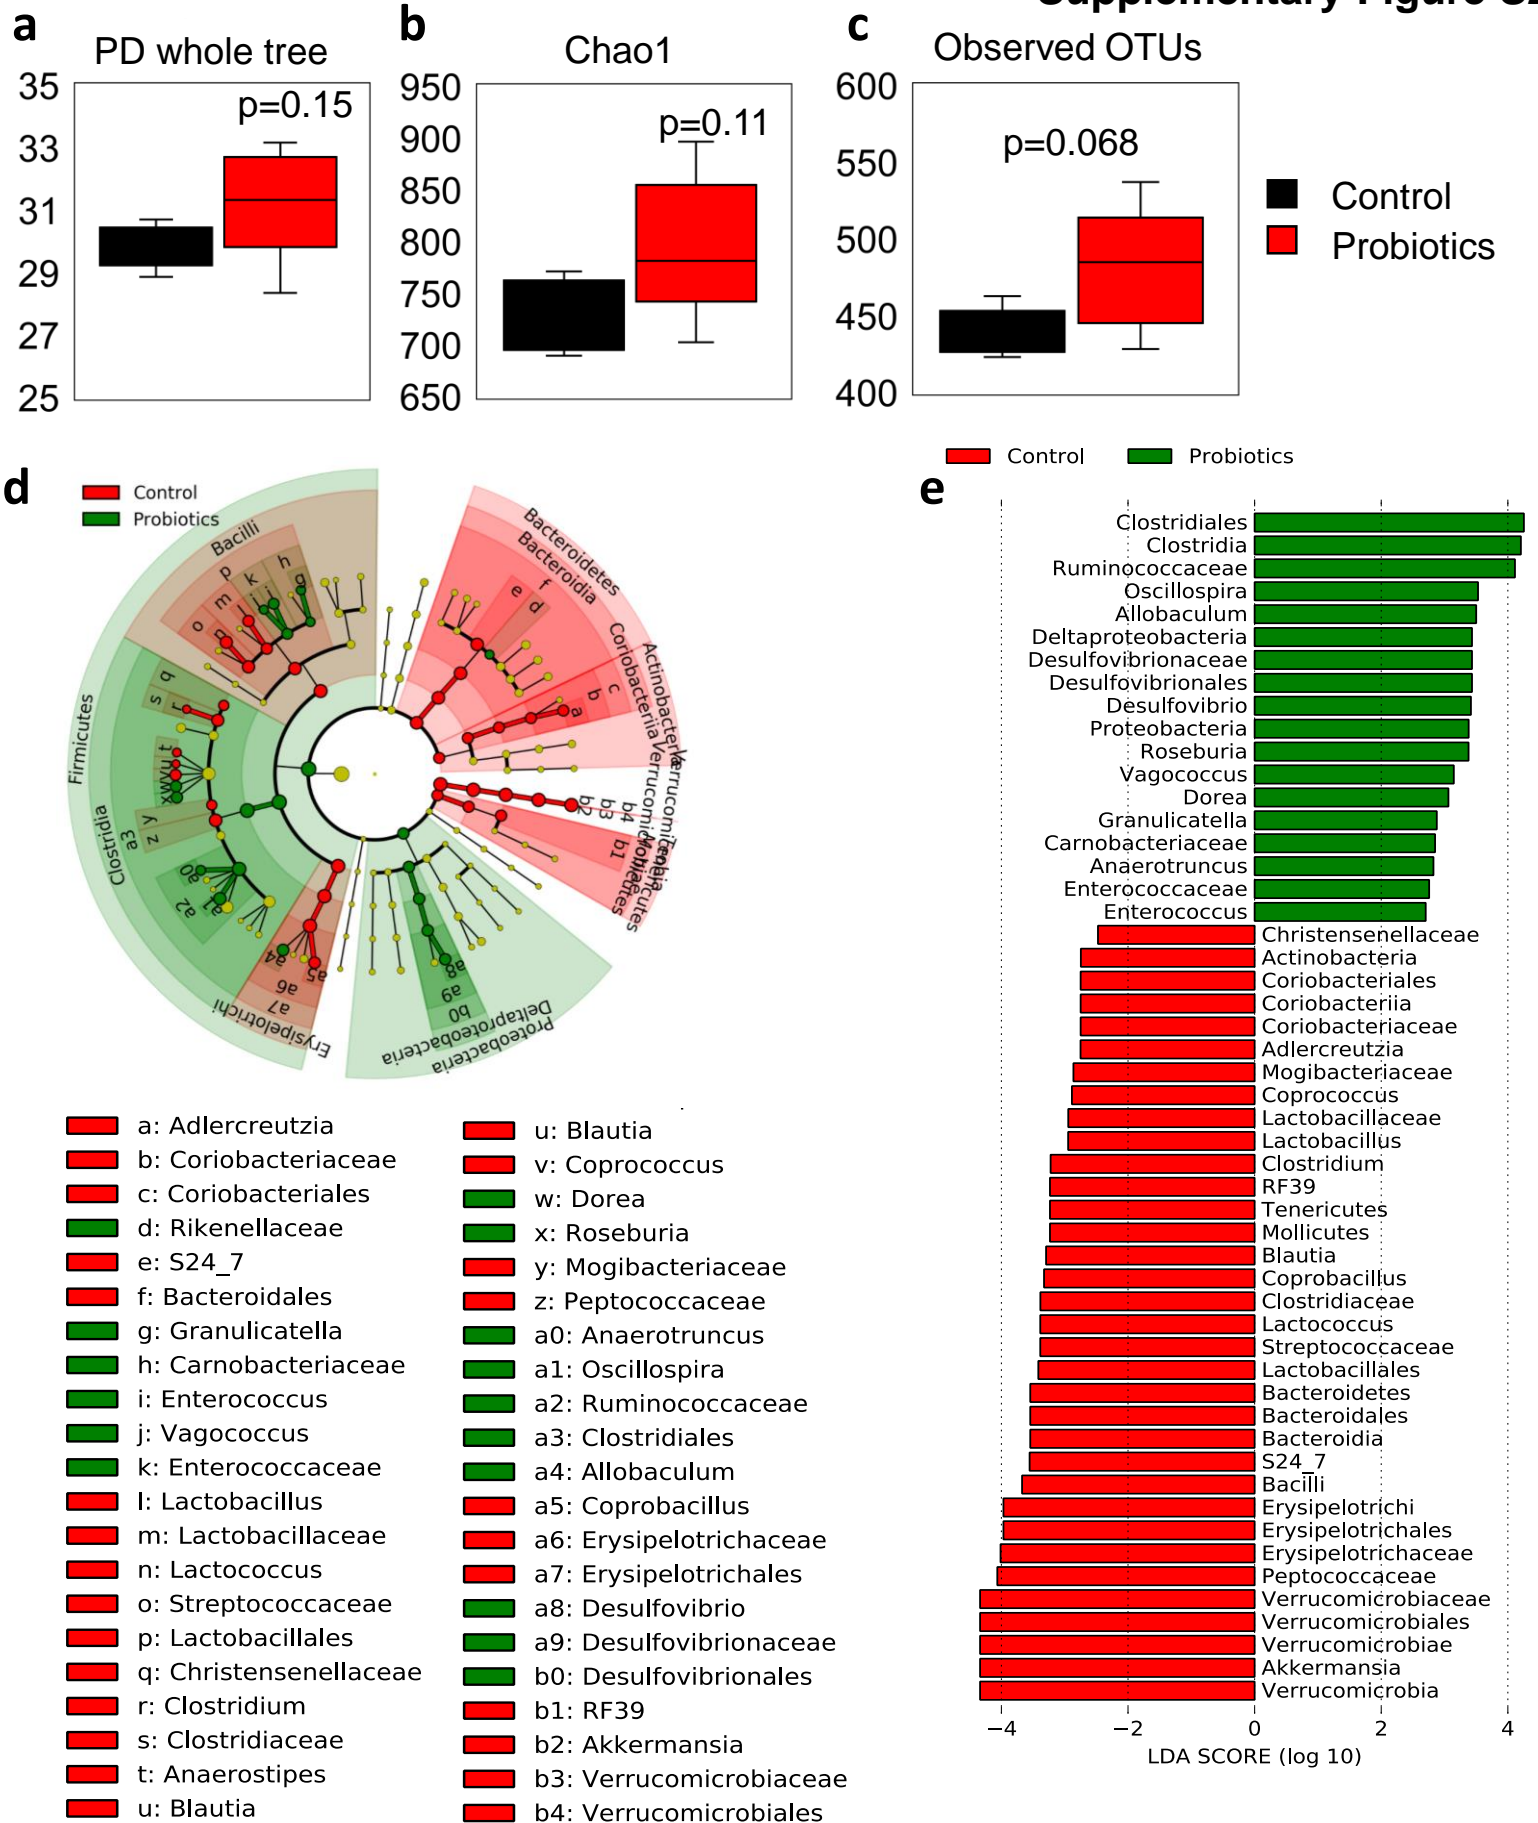

**Supplementary Figure S2.** Probiotic feeding modulated gut microbiome alpha-diversity indices like phylogenetic diversity (PD) whole tree (a), Chao1 (b) and observed operational taxonomic units (OUTs) (c), and changes in microbial signature shown by LefSe cladogram and differential bacteria abundances, compared to control older mice feces. Values are presented graph bar as means of  $n=5$  mice per group and error bars are SEM.

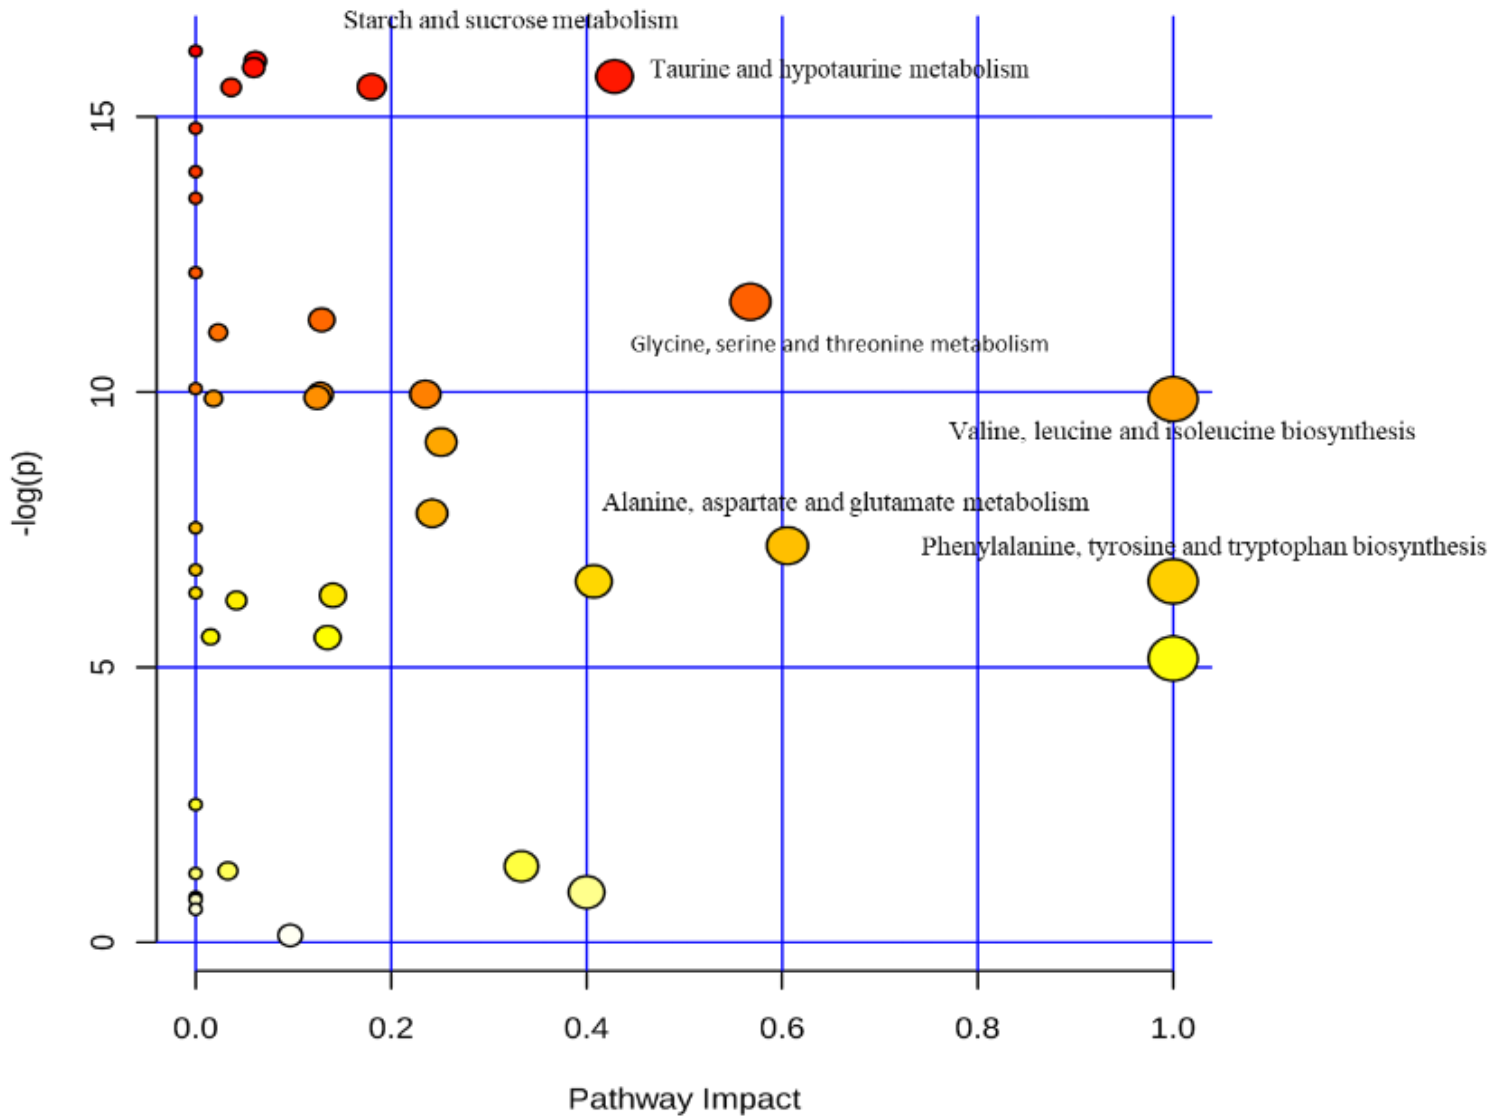

**Supplementary Figure S3.** Kyoto Encyclopedia of Genes and Genomes (KEGG) pathways analysis plot using pathway enrichment analysis and pathway impact values show the major significantly affected after probiotics feeding were taurine and hypotaurine metabolism.

# Supplementary Figure S4

## a

### Soft plate method

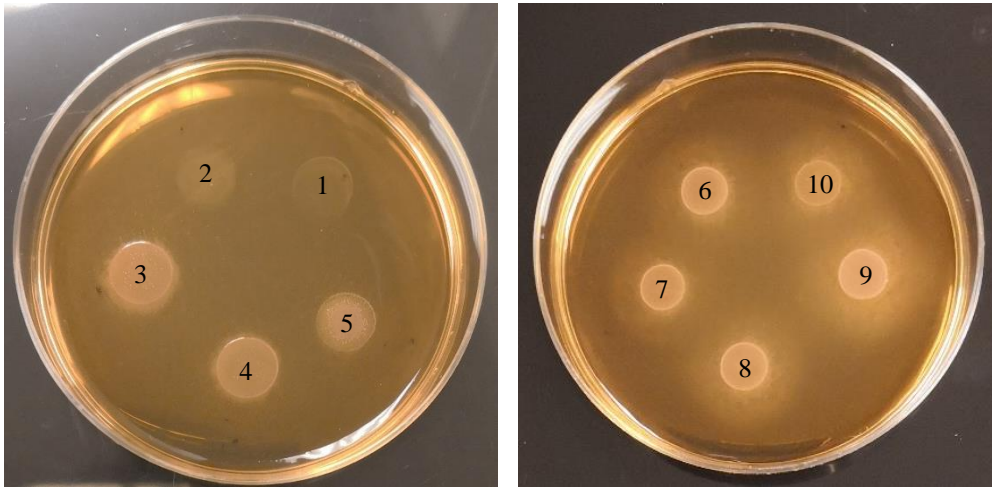

1. *L. paracasei* D3-5
2. *L. rhamnosus* D4-4
3. *L. plantarum* D6-2
4. *L. rhamnosus* D7-5
5. *L. plantarum* D13-4
6. *E. ramosus* D24-1
7. *E. INBio* D24-2
8. *E. avium* D25-1
9. *E. avium* D25-2
10. *E. avium* D26-1

## b

### Solid plate method

### Plates With Taurodeoxycholic acid

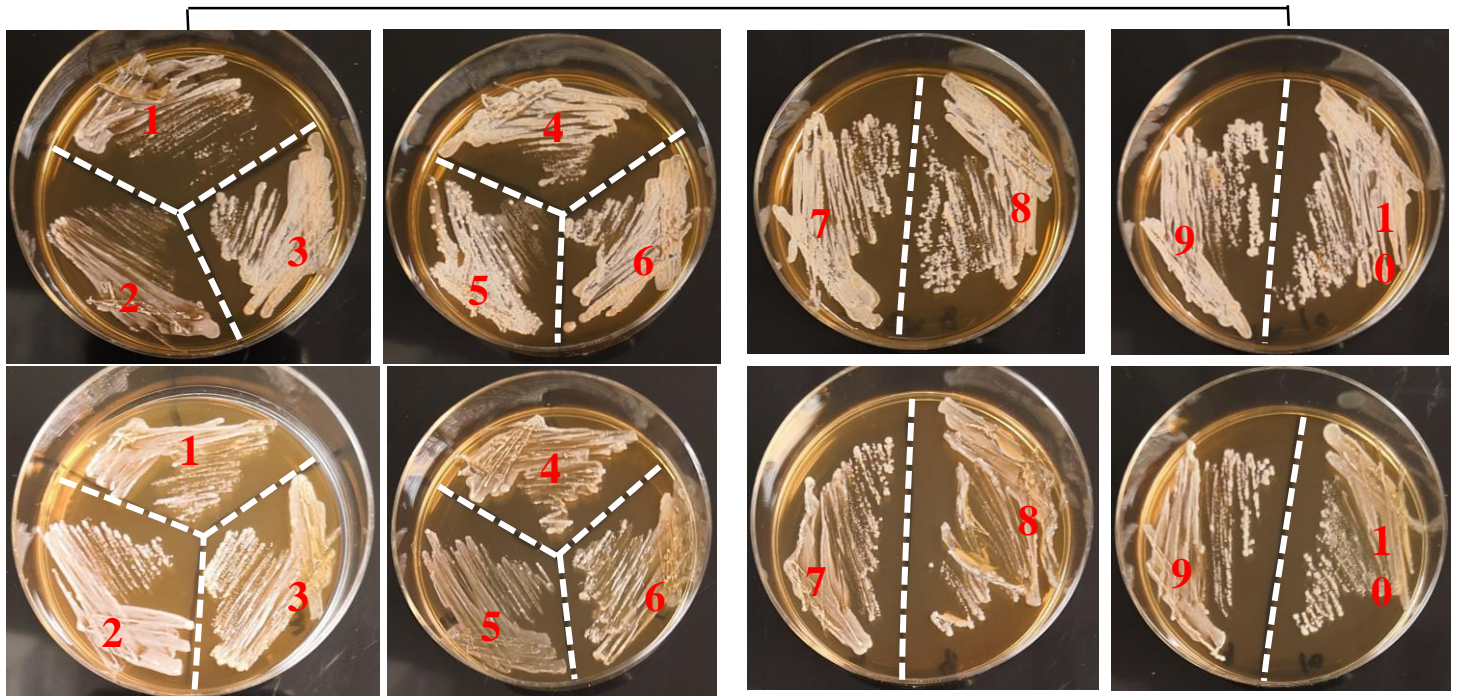

### Plates without Taurodeoxycholic acid

**Supplementary Figure S4.** BSH activity in probiotic strains using soft plate (a) and solid plate (b) methods.

## Supplementary Figure S5

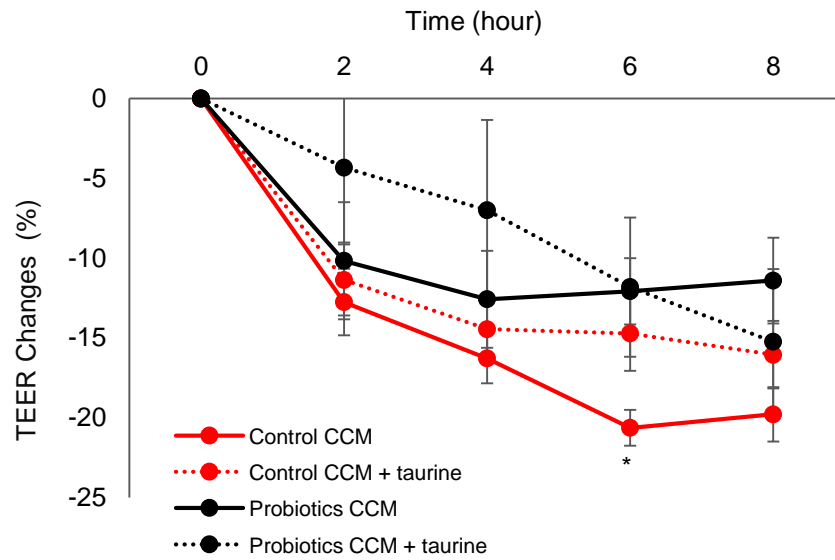

**Supplementary Figure S5.** Taurine supplementation in cecal conditioned media (CCM) in control significantly reduced changes in TEER of Caco2 cells monolayer.



## Supplementary Figure S6

Control

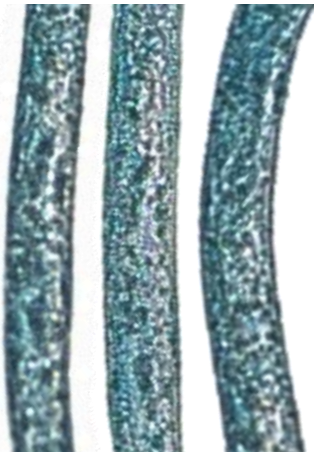

Taurine

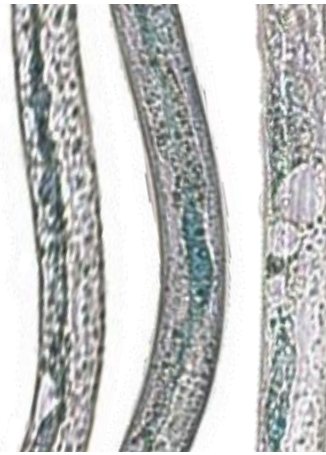

**Supplementary Figure S6.** Smurf assay showing leaky gut with higher blue color leaked in abdominal cavity of control worms compared to taurine treated animals (blue dye in gastrointestinal cavity lining). This assay was repeated 2-3 times with 20-30 worms/ repeat with leaky gut versus normal gut were visualized and counted.

## Supplementary Tables

| <b>Table S1. Primer details and sequences used in this study.</b> |                         |                        |
|-------------------------------------------------------------------|-------------------------|------------------------|
| <i>SYBR green primers</i>                                         |                         |                        |
| Gene name                                                         | Forward Primer (5'→3')  | Reverse Primer (5'→3') |
| 18S                                                               | gcaattattccccatgaacg    | ggcctcactaaaccatccaa   |
| mIL6                                                              | ccaagaggtgagtgtctccc    | ctgtgttcagactctctccct  |
| mTnf-a                                                            | ccctcacactcagatcatcttct | gctacgacgtgggctacag    |
| mTgf-b1                                                           | ctcccgtggcttctagtgc     | gccttagttggacaggatctg  |
| mIL10                                                             | gctcttactgactggcatgag   | cgcagctctaggagcatgtg   |
| mIL-1b                                                            | gcaactgttcctgaactcaact  | atctttgggggccgtcaact   |
| hIL-10                                                            | ctgtgaaaacaagagcaaggc   | gaagcttctgttggctccc    |
| hTGFb1                                                            | gcagcacgtggagctgta      | cagccggttgctgaggta     |
| mTjp1                                                             | gccgctaagagcacagcaa     | tcccactctgaaaatgagga   |
| mOcln                                                             | ttgaaagtccacctccttacaga | ccggataaaaagagtacgctgg |
| hTjp1                                                             | caacatacagtgacgcttcaca  | cactattgacgtttcccactc  |
| hOcln                                                             | acaagcggtttatccagagtc   | gtcatccacaggcgaagttaat |
| <i>Taqman primers</i>                                             |                         |                        |
| Gene Name                                                         | Probe ID                |                        |
| IL6                                                               | Hs00174131-m1           |                        |
| TNF                                                               | Hs00174128-m1           |                        |
| 18S                                                               | Hs9999990_s1            |                        |
| TJP1                                                              | Hs01551861_m1           |                        |
| IL6                                                               | Hs00174131-m1           |                        |



**Table S2. Primary and secondary antibodies details used in this study.**

**Primary antibodies**

| <i>Antibody name</i> | <i>Cat #</i> | <i>Company</i> |
|----------------------|--------------|----------------|
| Zo-1                 | 8193S        | Cell signaling |
| Ocln                 | 71-1500      | Invitrogen     |
| Tubulin              | T6074-200    | Sigma          |

**Secondary antibodies**

| <i>Antibody name</i> | <i>Cat #</i> | <i>Company</i>           |
|----------------------|--------------|--------------------------|
| Anti-Rabbit-HRP      | 70745        | Cell Signaling           |
| Anti-Mouse-HRP       | A2219        | Santa Cruz Biotechnology |
